# Supplementary material for: High-Density SNP Mapping of the HLA Region Identifies Multiple Independent Susceptibility Loci Associated with Selective IgA Deficiency
Source: PLoS Genet. 2012 Jan 26;8(1):e1002476. doi: 10.1371/journal.pgen.1002476 (PMC3266887; doi:10.1371/journal.pgen.1002476)
Supplement: Table S1 — Distribution of HLA-DRB1*0301 haplotypes in the 3 cases-control series. Shown are summary statistics for the distribution of extended and recombinant (non-B*0801) HLA-DRB1*0301 haplotypes in the 3 case-control series. P values were calculated using a two-tailed Fisher's exact probability test comparing the frequency of recombinant DRB1*0301 haplotypes in cases and controls. Odds ratios were calculated relative to the frequency of extended HLA-B*0801-DRB1*0301-DQB1*02 haplotypes. Combined P value and odds ratio were calculated using a Cochran-Mantel-Haenszel test. a Extended DR3 represent all extended HLA-B*0801-DRB1*0301-DQB1*02 haplotypes; b Recombinant DR3 represent all recombinant (non-B*0801) DRB1*0301 haplotypes. N, number of haplotypes; OR, odds ratio. (XLS) [file pgen.1002476.s002.xls]

## Sheet: Sheet1
	Cases			Controls
Population	Extended DR3 (N) a	Recombinant DR3 (N) b	% Recombinant	Extended DR3 (N)	Recombinant DR3 (N)	% Recombinant	P	OR (95% CI)
Sweden/Iceland	218	36	14.1732	211	85	28.7162	5.0 x 10-5	2.44 (1.58-3.76)
Finland	40	7	14.8936	94	34	26.5625	0.113	2.07 (0.84-5.05)
Spain	54	51	48.5714	17	60	77.9221	6.1 x 10-5	3.74 (1.93-7.24)
Combined	312	94	23.1527	322	179	35.7285	6.3 x 10-9	2.65 (1.90-3.71)
